# Supplementary material for: Incidence and Survival Changes in Patients with Esophageal Adenocarcinoma during 1984–2013
Source: Hindawi journal article supplement (doi:10.1155/2019/7431850), 2019-12-12
Supplement: f1 [file 7431850.f1.pdf]

**Incidence and survival changes in patients with esophageal adenocarcinoma during 1984-2013**

**Haiyu Zhang <sup>1,\*</sup>, Xiaofeng Pei <sup>2,\*</sup>, Xiangqiong Mo <sup>3</sup>, Junlan Qiu <sup>4</sup>, Xiaobin Zheng<sup>5</sup>, Shuncong Wang <sup>6</sup>, Huanhuan Sun <sup>1,#</sup>, Haiqing Ma <sup>1,#</sup>**

**<sup>1</sup> Department of Department of Oncology, The Fifth Affiliated Hospital of Sun Yat-Sen University, Zhuhai, Guangdong 519000, China;**

**<sup>2</sup> Department of Thoracic Oncology, The Fifth Affiliated Hospital of Sun Yat-Sen University, Zhuhai, Guangdong 519000, China;**

**<sup>3</sup> Department of Gastrointestinal Surgery, MD, The Fifth Affiliated Hospital of Sun Yat-Sen University, Zhuhai, Guangdong 519000, China;**

**<sup>4</sup> Department of Anesthesiology and Perioperative Medicine, The Affiliated Suzhou Hospital (West District) of Nanjing Medical University; Suzhou Science and Technology Town Hospital, Suzhou 215153, China;**

**<sup>5</sup> Department of Respiratory Medicine, The Fifth Affiliated Hospital of Sun Yat-Sen University, Zhuhai, Guangdong 519000, China;**

**<sup>6</sup> Theragnostic Laboratory, Biomedical Sciences Group, KU Leuven, Leuven 3000, Belgium.**

**\*These authors have contributed equally to this work.**

**#Correspondence to: Huanhuan Sun email: [sunhuanh3@mail.sysu.edu.cn](mailto:sunhuanh3@mail.sysu.edu.cn)**

**Hai-Qing Ma, email: [mahaiqing@mail.sysu.edu.cn](mailto:mahaiqing@mail.sysu.edu.cn)**

**Telephone Number: +86-756-2528888**

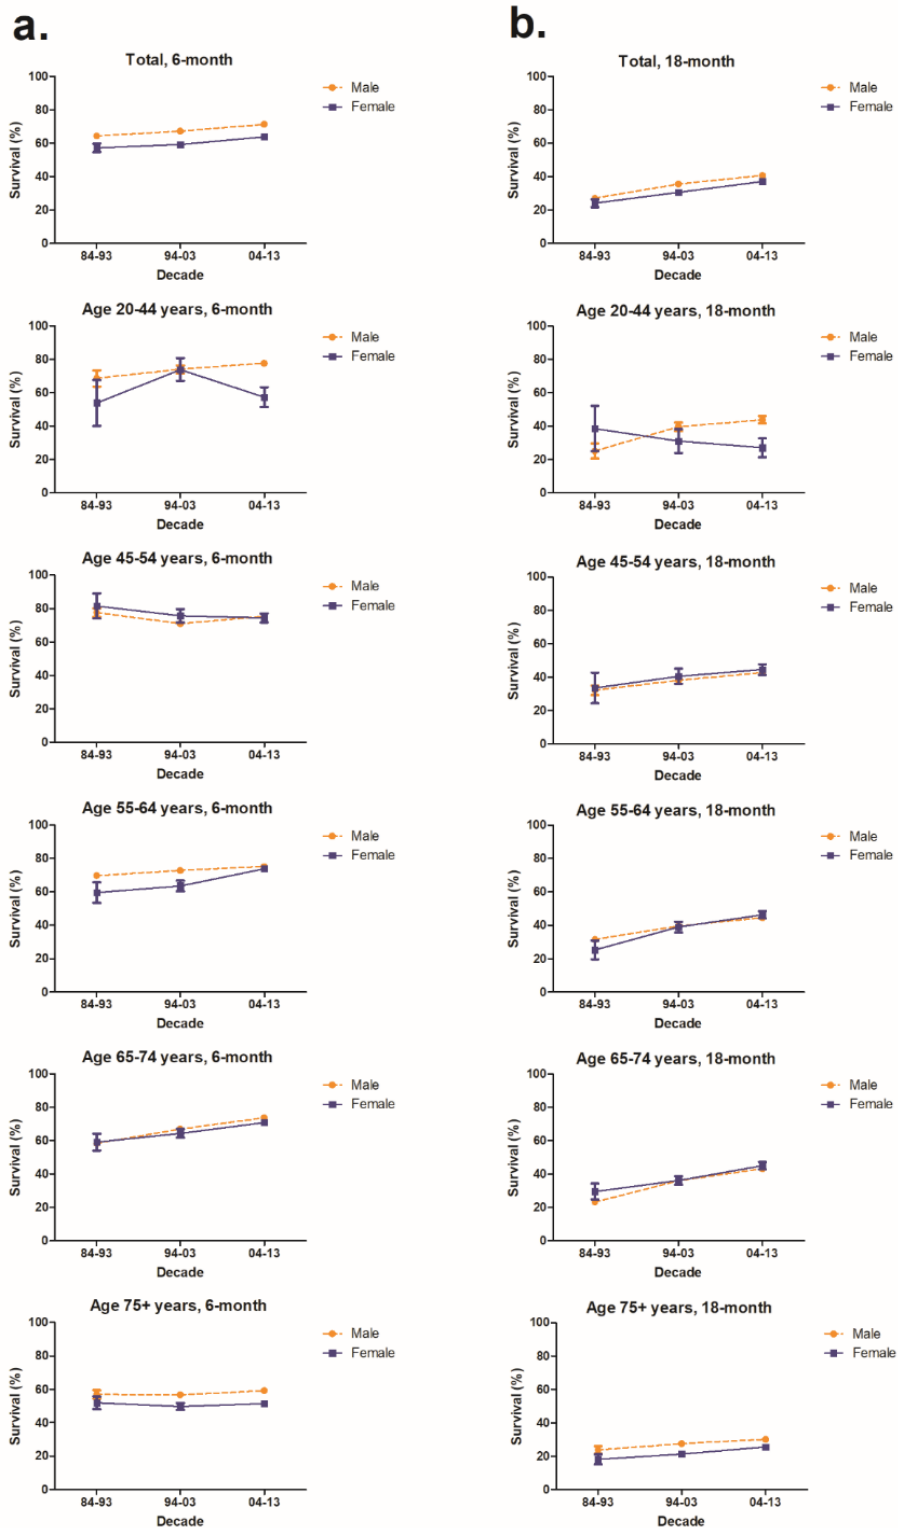

**Figure S1. 6-month (a) and 18-month (b) relative survival rates for patients with EAC at nine SEER sites from 1984 to 2013 according to sex and age group (total and ages 20-44, 45-54, 55-64, 64-74 and 75+ years).**

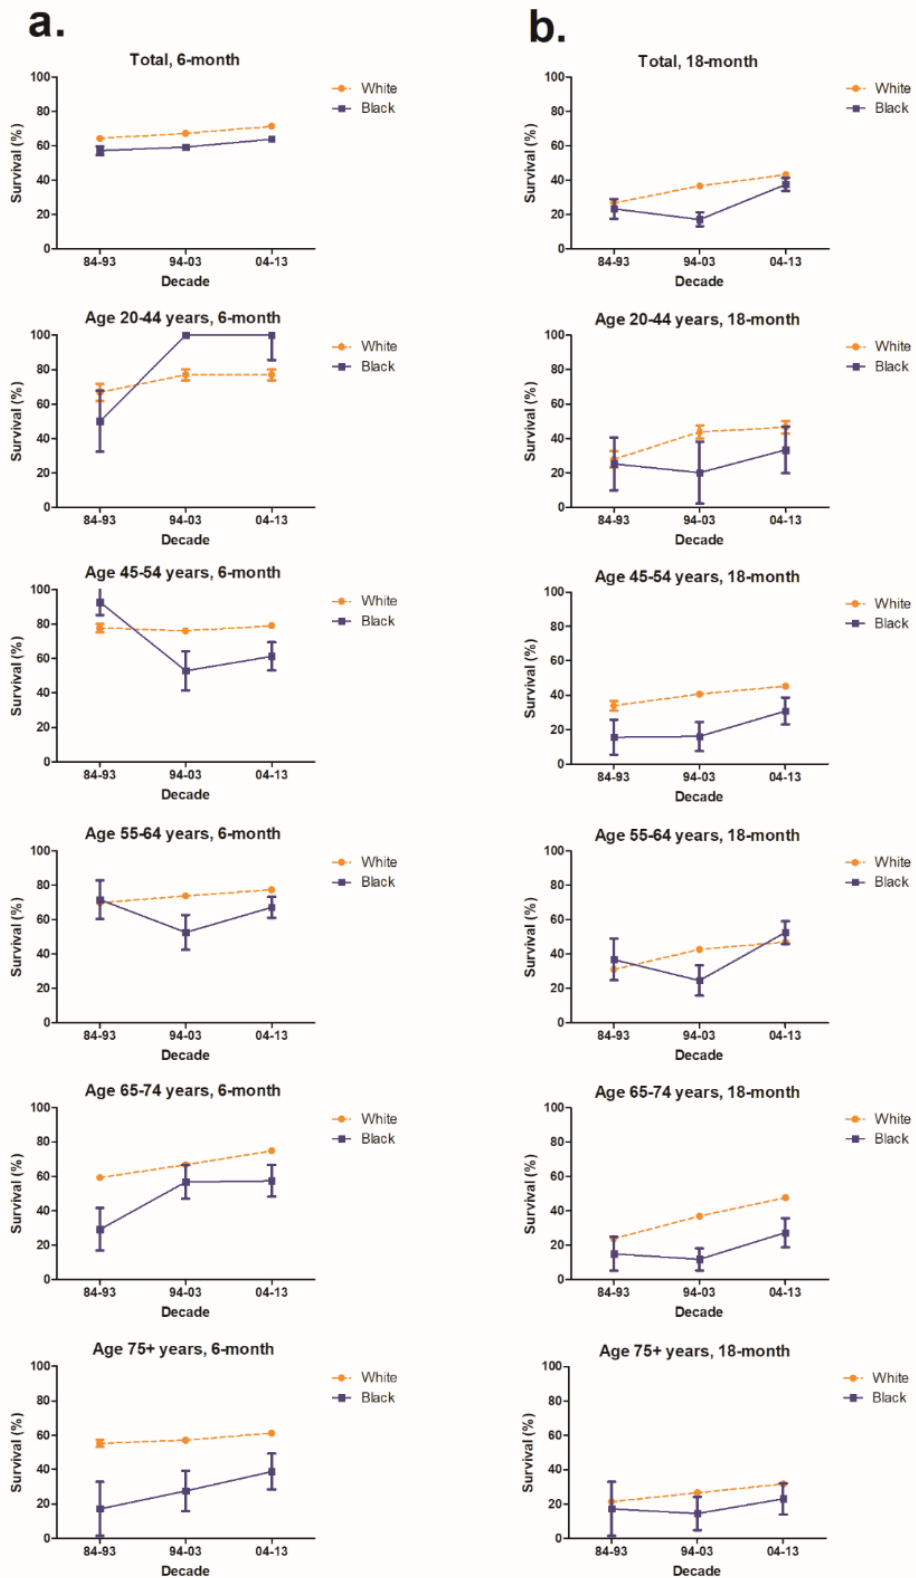

**Figure S2. 6-month (a) and 18-month (b) relative survival rates for patients with EAC at nine SEER sites from 1984 to 2013 according to race and age group (total and ages 20-44, 45-54, 55-64, 64-74 and 75+ years).**

**a.**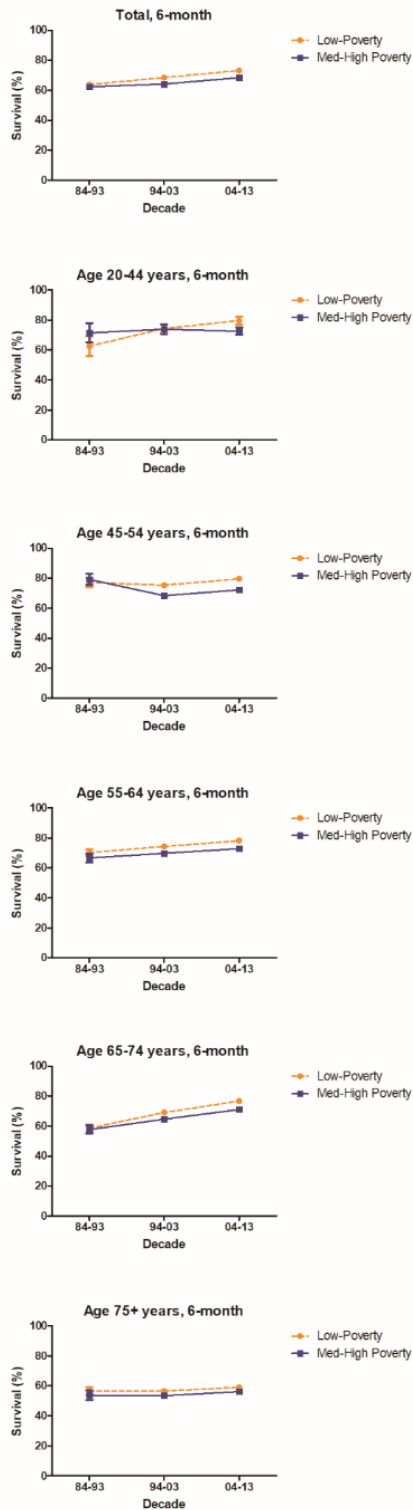**b.**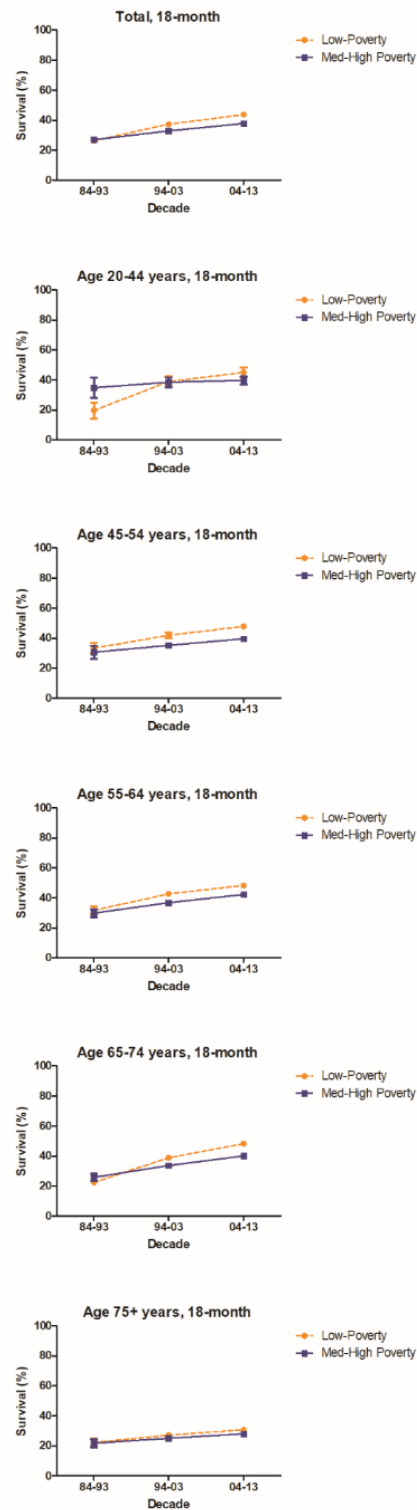

**Figure S3. 6-month (a) and 18-month (b) relative survival rates for patients with EAC at nine SEER sites from 1984 to 2013 according to SES and age group (total and ages 20-44, 45-54, 55-64, 64-74 and 75+ years).**

### 1984-2013

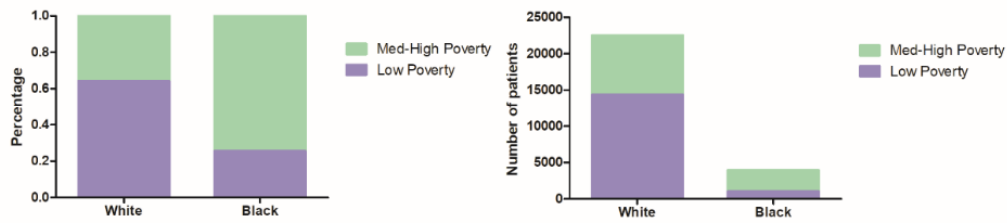

### 1984-1993

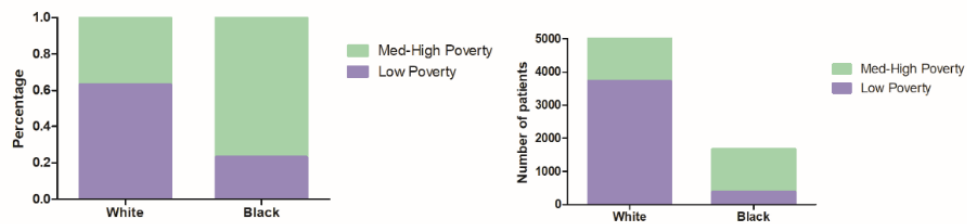

### 1994-2003

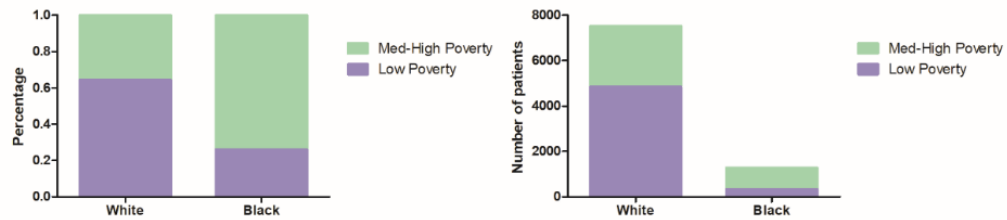

### 2004-2013

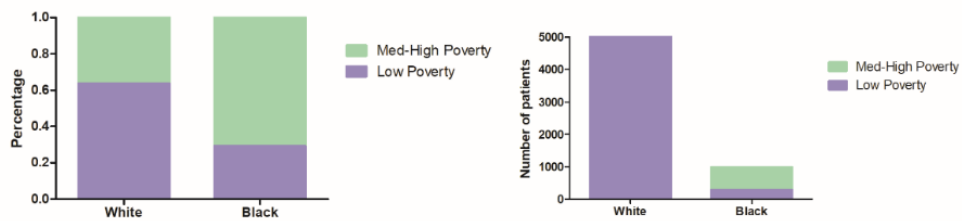

**Figure S4. Distribution of SES by race for patients with EAC at nine SEER sites during 1984-2013, 1984-1993, 1994-2003 and 2004-2013, respectively. Percentage (a) and number (b) of patients with EAC in Low-poverty, Med-High-Poverty groups.**

**Table S1. The incidence of EAC according to age and decade within sex, SES, and race groups.**

| Variable     | Age Groups    | Decade     |             |             |
|--------------|---------------|------------|-------------|-------------|
|              |               | 1984-1993  | 1994-2003   | 2004-2013   |
| <b>Total</b> |               |            |             |             |
|              | All           | 1.8 (2715) | 3.1 (5528)  | 3.9 (8231)  |
|              | 20-44         | 0.1 (104)  | 0.2 (205)   | 0.2 (219)   |
|              | 45-54         | 1.3 (298)  | 2.1 (719)   | 2.3 (964)   |
|              | 55-64         | 3.4 (683)  | 5.8 (1255)  | 7.1 (2293)  |
|              | 65-74         | 6.0 (937)  | 10.4 (1683) | 12.6 (2296) |
|              | 75+           | 6.2 (693)  | 11.4 (1666) | 14.9 (2459) |
| <b>Sex</b>   |               |            |             |             |
| <b>Male</b>  |               |            |             |             |
|              | All           | 3.5 (2308) | 6.1 (4717)  | 7.3 (7036)  |
|              | 20-44         | 0.2 (90)   | 0.4 (182)   | 0.4 (196)   |
|              | 45-54         | 2.4 (272)  | 3.9 (662)   | 4.0 (829)   |
|              | 55-64         | 6.5 (618)  | 10.7 (1118) | 13.1 (2039) |
|              | 65-74         | 12.0 (827) | 20.4(1479)  | 23.7 (1997) |
|              | 75+           | 12.4 (501) | 23.5 (1276) | 30.6 (1975) |
|              | <b>Female</b> |            |             |             |
|              | All           | 0.5 (407)  | 0.8 (811)   | 1.0 (1195)  |
|              | 20-44         | 0.0 (14)   | 0.0(23)     | 0.0 (23)    |
|              | 45-54         | 0.2 (26)   | 0.3 (57)    | 0.6 (135)   |
|              | 55-64         | 0.6 (65)   | 1.2 (137)   | 1.5 (254)   |
|              | 65-74         | 1.3 (110)  | 2.3 (204)   | 3.1 (299)   |
|              | 75+           | 2.6 (192)  | 4.2 (390)   | 4.6 (484)   |
| <b>Race</b>  |               |            |             |             |
| <b>White</b> |               |            |             |             |
|              | All           | 2.0 (2601) | 3.7 (5307)  | 4.6 (7802)  |
|              | 20-44         | 0.1 (93)   | 0.3 (192)   | 0.3 (196)   |
|              | 45-54         | 1.4 (281)  | 2.5 (685)   | 2.8 (888)   |
|              | 55-64         | 3.9 (652)  | 6.9 (1202)  | 8.5 (2158)  |
|              | 65-74         | 6.7 (904)  | 12.2 (1616) | 15.1 (2200) |
|              | 75+           | 6.8 (571)  | 12.9 (1612) | 17.4 (2360) |
|              | <b>Black</b>  |            |             |             |
|              | All           | 0.5 (65)   | 0.7 (107)   | 1.0 (202)   |
|              | 20-44         | 0.1 (8)    | 0.0 (5)     | 0.1 (12)    |
|              | 45-54         | 0.6 (13)   | 0.6 (21)    | 0.8 (38)    |
|              | 55-64         | 1.2 (19)   | 1.4 (27)    | 2.1 (69)    |
|              | 65-74         | 1.5 (18)   | 2.7 (34)    | 2.7 (44)    |
|              | 75+           | 1.0 (7)    | 2.1 (20)    | 3.4 (39)    |
|              | <b>Other</b>  |            |             |             |
|              | All           | 0.5 (49)   | 0.7 (114)   | 0.9 (227)   |
|              | 20-44         | 0.0 (3)    | 0.1 (8)     | 0.1 (11)    |
|              | 45-           | 0.2 (4)    | 0.4 (13)    | 0.8 (38)    |

|     |         |       |            |             |             |
|-----|---------|-------|------------|-------------|-------------|
|     |         | 54    |            |             |             |
|     |         | 55-64 | 0.8 (12)   | 1.2 (26)    | 1.8 (66)    |
|     |         | 65-74 | 1.4 (15)   | 2.1 (33)    | 2.5 (52)    |
|     |         | 75+   | 2.5 (15)   | 3.1 (34)    | 3.5 (60)    |
| SES | Low     |       |            |             |             |
|     | Poverty |       |            |             |             |
|     |         | All   | 2.1 (1713) | 3.5 (3539)  | 4.1 (5236)  |
|     |         | 20-44 | 0.1 (58)   | 0.3 (146)   | 0.3 (141)   |
|     |         | 45-54 | 1.5 (197)  | 2.2 (443)   | 2.4 (607)   |
|     |         | 55-64 | 3.9 (431)  | 6.6 (826)   | 7.4 (1427)  |
|     |         | 65-74 | 6.8 (585)  | 11.4 (1039) | 13.5 (1461) |
|     |         | 75+   | 7.1 (442)  | 12.8 (1085) | 16.1 (1600) |
|     | Medium  |       |            |             |             |
|     | Poverty |       |            |             |             |
|     |         | All   | 1.5 (968)  | 2.7 (1868)  | 3.5 (2802)  |
|     |         | 20-44 | 0.1 (45)   | 0.1 (54)    | 0.2 (76)    |
|     |         | 45-54 | 1.0 (96)   | 1.9 (262)   | 2.2 (340)   |
|     |         | 55-64 | 2.9 (245)  | 4.8 (406)   | 6.7 (812)   |
|     |         | 65-74 | 5.2 (343)  | 9.1 (597)   | 11.3 (773)  |
|     |         | 75+   | 5.0 (239)  | 9.6 (549)   | 13.3 (801)  |
|     | High    |       |            |             |             |
|     | Poverty |       |            |             |             |
|     |         | All   | 1.0 (34)   | 2.6 (121)   | 3.3 (193)   |
|     |         | 20-44 | 0.1 (1)    | 0.2 (5)     | 0.1 (2)     |
|     |         | 45-54 | 0.9 (5)    | 1.7 (14)    | 1.6 (17)    |
|     |         | 55-64 | 1.4 (7)    | 3.8 (23)    | 6.3 (54)    |
|     |         | 65-74 | 2.5 (9)    | 10.2 (47)   | 11.0 (62)   |
|     |         | 75+   | 4.8 (12)   | 9.4 (32)    | 13.3 (58)   |

Data are incidence per 100,000 people by year of diagnosis, with the number of patients in parentheses

**Table S2. 12-month relative survival rates of EAC patients according to sex, age and three decades.**

| Decade | Age Group       | Sex               |                     |
|--------|-----------------|-------------------|---------------------|
|        |                 | Male              | Female              |
| 84-93  | 12-Mo           |                   |                     |
|        | RSR             |                   |                     |
|        | All             | 40.3±1.1 (2202)   | 32.6±2.5(382) ***   |
|        | 20-44           | 37.1±5.0 (92)     | 38.5±13.5(13)       |
|        | 45-54           | 49.8±3.0 (284)    | 40.9±9.5(27)        |
|        | 55-64           | 44.4±2 (635)      | 39.4±6.1(64)        |
|        | 65-74           | 35.6±1.8 (758)    | 35.8±5(94)          |
| 75+    | 36.9±2.5 (433)  | 26.9±3.4(184) *   |                     |
| 94-03  | 12-Mo           |                   |                     |
|        | RSR             |                   |                     |
|        | All             | 46.6±0.6 (7855)   | 40.8±1.4 (1341) *** |
|        | 20-44           | 52.5±2.6 (367)    | 50.1±7.7(42)        |
|        | 45-54           | 49.1±1.4 (1279)   | 59.8±4.5(119) *     |
|        | 55-64           | 51.2±1.1 (2074)   | 49.8±3.3(242)       |
|        | 65-74           | 47.1±1.1 (2340)   | 45.2±2.7(352)       |
| 75+    | 37.5±1.2 (1795) | 29.5±2(586) **    |                     |
| 04-13  | 12-Mo           |                   |                     |
|        | RSR             |                   |                     |
|        | All             | 51.5±0.4 (15619)  | 46.5±1.1 (2492) *** |
|        | 20-44           | 56.6±2.2 (549)    | 43.6±6(73) *        |
|        | 45-54           | 54.8±1.1 (2277)   | 54.4±3.1(273)       |
|        | 55-64           | 55.9±0.7 (4908)   | 56.2±2.2(561)       |
|        | 65-74           | 53.3±0.8(4345)    | 55.2±2.1(601)       |
| 75+    | 40.1±0.9(3540)  | 33.4±1.6(984) *** |                     |

Data are means ± standard error of the mean, with number of patients in parentheses  
Abbreviations: Mo, month; RSR, relative survival rate SEM, standard error of the mean.  

\* $p < 0.05$ , \*\*  $p < 0.001$ , and \*\*\*  $p < 0.0001$  for comparisons with the Male group.



Table S3. 6-month and 18-month relative survival rates of EAC patients according to sex, age and three decades.

| Decade | Age Group | Sex                |                       |  |
|--------|-----------|--------------------|-----------------------|--|
|        |           | Male               | Female                |  |
| 84-93  | 6-Mo RSR  |                    |                       |  |
|        | All       | 64.3 ± 1.0 (2202)  | 57.2 ± 2.6(382) *     |  |
|        | 20-44     | 68.6 ± 4.9 (92)    | 53.9 ± 13.8 (13)      |  |
|        | 45-54     | 77.6 ± 2.5 (284)   | 81.6 ± 7.5 (27)       |  |
|        | 55-64     | 69.7 ± 1.8 (635)   | 59.6 ± 6.2 (64)       |  |
|        | 65-74     | 58.3 ± 1.8 (758)   | 59.1 ± 5.1 (94)       |  |
|        | 75+       | 57.0 ± 2.5 (433)   | 52.0 ± 3.8 (184)      |  |
|        | 18-Mo     |                    |                       |  |
|        | All       | 26.9 ± 1.0 (2017)  | 24.1 ± 2.4(351)       |  |
|        | 20-44     | 26.5 ± 4.7 (87)    | 38.5 ± 13.5 (13)      |  |
|        | 45-54     | 32.6 ± 2.9 (263)   | 36.2 ± 9.7 (25)       |  |
|        | 55-64     | 31.9 ± 2.0 (577)   | 23.1 ± 5.6 (57)       |  |
|        | 65-74     | 23.1 ± 1.7 (698)   | 28.1 ± 4.9 (88)       |  |
|        | 75+       | 22.2 ± 2.3 (392)   | 19.3 ± 3.3 (168)      |  |
| 94-03  | 6-Mo RSR  |                    |                       |  |
|        | All       | 67.2 ± 0.5 (7855)  | 59.2 ± 1.4 (1341) *** |  |
|        | 20-44     | 74.1 ± 2.3 (367)   | 73.9 ± 6.8 (42)       |  |
|        | 45-54     | 71.0 ± 1.3 (1279)  | 75.7 ± 3.9 (119)      |  |
|        | 55-64     | 72.8 ± 1.0 (2074)  | 63.5 ± 3.1 (242) *    |  |
|        | 65-74     | 66.9 ± 1.0 (2340)  | 64.4 ± 2.6 (352)      |  |
|        | 75+       | 56.7 ± 1.2 (1795)  | 49.7 ± 2.1 (586) *    |  |
|        | 18-Mo     |                    |                       |  |
|        | All       | 36.6 ± 0.8 (3996)  | 32.1 ± 1.9 (636) *    |  |
|        | 20-44     | 44.2 ± 3.8 (176)   | 26.4 ± 10.1 (19)      |  |
|        | 45-54     | 39.9 ± 1.9 (642)   | 39.8 ± 6.7 (53)       |  |
|        | 55-64     | 41.3 ± 1.6 (1032)  | 48.0 ± 4.7 (115)      |  |
|        | 65-74     | 36.2 ± 1.4 (1219)  | 37.3 ± 3.9 (165)      |  |
|        | 75+       | 27.7 ± 1.6 (927)   | 21.3 ± 2.6 (284) *    |  |
| 04-13  | 6-Mo RSR  |                    |                       |  |
|        | All       | 71.3 ± 0.4 (15619) | 63.9 ± 1.0 (2492) *** |  |
|        | 20-44     | 77.7 ± 1.8 (549)   | 57.4 ± 5.9 (73) **    |  |
|        | 45-54     | 75.3 ± 0.9 (2277)  | 74.4 ± 2.7 (273)      |  |
|        | 55-64     | 75.2 ± 0.6 (4908)  | 73.8 ± 1.9 (561)      |  |
|        | 65-74     | 73.7 ± 0.7 (4345)  | 70.9 ± 1.9 (601)      |  |
|        | 75+       | 59.2 ± 0.9 (3540)  | 51.5 ± 1.7 (984) ***  |  |
|        | 18-Mo     |                    |                       |  |
|        | All       | 43.1 ± 0.7 (5730)  | 40.4 ± 1.7 (940)      |  |
|        | 20-44     | 47.1 ± 3.7 (190)   | 27.3 ± 10.0 (21)      |  |
|        | 45-54     | 43.7 ± 1.8 (795)   | 47.3 ± 4.6 (120)      |  |
|        | 55-64     | 46.6 ± 1.2 (1850)  | 48.6 ± 3.4 (220)      |  |
|        | 65-74     | 46.7 ± 1.3 (1563)  | 49.8 ± 3.4 (234)      |  |
|        | 75+       | 32.7 ± 1.4 (1332)  | 26.6 ± 2.6 (345) *    |  |

Data are means ± standard error of the mean, with number of patients in parentheses. Abbreviations: Mo, month; RSR, relative survival rate; SEM, standard error of the mean. \* $p < 0.05$ , \*\* $p < 0.001$ , and \*\*\* $p < 0.0001$  for comparisons with the Male group.

**Table S4. 12-month relative survival rates of EAC patients according to race, age and three decades.**

| Decade | Age Group | Race               |                         |                        |
|--------|-----------|--------------------|-------------------------|------------------------|
|        |           | White              | Black                   | Other                  |
| 84-93  | 12-Mo RSR |                    |                         |                        |
|        | All       | 39.3 ± 1.0 (2462)  | 36.2 ± 5.9 (68)         | 37.9 ± 6.7 (54)<br>*** |
|        | 20-44     | 37.3 ± 5.0 (94)    | 33.5 ± 15.8 (9)         | 50.0 ± 35.4 (2)        |
|        | 45-54     | 49.9 ± 3.0 (289)   | 35.7 ± 1.7 (17)         | 40.1 ± 22.0 (5)        |
|        | 55-64     | 43.6 ± 2.0 (665)   | 53.6 ± 1.7 (19)         | 46.9 ± 12.9 (15)       |
|        | 65-74     | 36.1 ± 1.7 (822)   | 20.7 ± 0.7 (15)         | 27.1 ± 11.6 (15)       |
|        | 75+       | 33.9 ± 2.1 (592)   | 25.7 ± 15.7 (8)         | 37.2 ± 12.2 (17)       |
| 94-03  | 12-Mo RSR |                    |                         |                        |
|        | All       | 46.1 ± 0.5 (8728)  | 35.6 ± 3.1 (259)<br>*** | 43.8 ± 3.5 (209)       |
|        | 20-44     | 52.7 ± 2.6 (381)   | 43.1 ± 13.3 (14)        | 50.1 ± 13.4 (14)       |
|        | 45-54     | 50.4 ± 0.4 (1319)  | 37.7 ± 6.8 (51)         | 53.7 ± 9.5 (28)        |
|        | 55-64     | 51.6 ± 0.1 (2188)  | 40.8 ± 6.0 (71)         | 43.2 ± 6.7 (57)        |
|        | 65-74     | 47.4 ± 1.0 (2551)  | 30.1 ± 5.4 (76) *       | 42.9 ± 6.3 (65)        |
|        | 75+       | 35.6 ± 1.1 (2289)  | 32.1 ± 7.2 (47)         | 37.6 ± 7.5 (45)        |
| 04-13  | 12-Mo RSR |                    |                         |                        |
|        | All       | 51.0 ± 0.4 (17165) | 45.6 ± 2.4 (489) *      | 48.6 ± 2.4 (457)       |
|        | 20-44     | 56.1 ± 2.2 (575)   | 40.7 ± 11.6 (19)        | 41.6 ± 9.9 (28)        |
|        | 45-54     | 55.1 ± 1.1 (2360)  | 45.6 ± 4.8 (120)        | 58.5 ± 6.1 (70)        |
|        | 55-64     | 56.3 ± 0.7 (5165)  | 50.7 ± 4.1 (166)        | 47.6 ± 4.5 (138) *     |
|        | 65-74     | 53.7 ± 0.8 (4735)  | 47.7 ± 5.1 (110)        | 49.2 ± 5.2 (101)       |
|        | 75+       | 38.5 ± 0.8 (4330)  | 32.4 ± 5.9 (74)         | 44.9 ± 4.8 (120)       |

Data are means ± standard error of the mean and the number of patients in parentheses. Abbreviations: Mo, month; RSR, relative survival rate; SEM, standard error of the mean. \* $p < 0.05$ , \*\* $p < 0.001$ , and \*\*\* $p < 0.0001$  for comparisons with the White group.

**Table S5. 6-month and 18-month relative survival rates of EAC patients according to race, age and three decades.**

| Decade    | Age Group | Race               |                     |                    |
|-----------|-----------|--------------------|---------------------|--------------------|
|           |           | White              | Black               | Other              |
| 84-93     | 6-Mo RSR  |                    |                     |                    |
|           | all       | 63.3 ± 1.0 (2462)  | 59.6 ± 6.0 (68)     | 63.8 ± 6.7 (54)    |
|           | 20-44     | 67.1 ± 4.9 (94)    | 55.7 ± 16.6(9) *    | 100.0 ± 0.0 (2)    |
|           | 45-54     | 77.3 ± 2.5 (289)   | 88.7 ± 7.9 (17)     | 80.0 ± 17.9 (5)    |
|           | 55-64     | 68.8 ± 1.8 (665)   | 74.7 ± 10.2 (19)    | 60.2 ± 12.7 (15)   |
|           | 65-74     | 59.0 ± 1.7 (822)   | 27.2 ± 11.7 (15)    | 53.8 ± 13.0 (15)   |
|           | 75+       | 55.6 ± 2.1 (592)   | 25.7 ± 15.7 (8)     | 66.1 ± 11.8 (17)   |
|           | 18-Mo RSR |                    |                     |                    |
|           | All       | 26.7 ± 0.9         | 21.4 ± 5.1          | 28.7 ± 6.3         |
|           | 20-44     | 26.7 ± 4.6         | 22.4 ± 13.9         | 50.0 ± 35.4        |
|           | 45-54     | 33.3 ± 2.8         | 11.9 ± 7.9          | 40.1 ± 22.0        |
|           | 55-64     | 30.8 ± 1.8         | 38.5 ± 1.6          | 26.9 ± 11.5        |
|           | 65-74     | 24.0 ± 1.5         | 14.0 ± 9.2          | 27.1 ± 11.6        |
|           | 75+       | 22.2 ± 1.9         | 13.8 ± 12.9         | 25.3 ± 11.1        |
|           | 94-03     | 6-Mo RSR           |                     |                    |
| all       |           | 66.3 ± 0.5 (8728)  | 56.4 ± 3.1 (259) ** | 66.4 ± 3.3 (209)   |
| 20-44     |           | 73.5 ± 2.3 (381)   | 78.7 ± 11.0 (14)    | 85.7 ± 9.4 (14)    |
| 45-54     |           | 71.9 ± 1.2 (1319)  | 61.1 ± 6.9 (51)     | 68.0 ± 8.8 (28)    |
| 55-64     |           | 72.4 ± 1.0 (2188)  | 60.6 ± 5.9 (71)     | 62.8 ± 6.5 (57)    |
| 65-74     |           | 67.0 ± 1.0 (2551)  | 52.3 ± 5.8 (76)     | 67.8 ± 5.9 (65)    |
| 75+       |           | 55.1 ± 1.1 (2289)  | 44.4 ± 7.5 (47)     | 61.8 ± 7.5 (45)    |
| 18-Mo RSR |           |                    |                     |                    |
| All       |           | 35.3 ± 0.5         | 21.6 ± 2.6 **       | 29.8 ± 3.2         |
| 20-44     |           | 39.7 ± 2.5         | 21.6 ± 11.0         | 28.6 ± 12.1        |
| 45-54     |           | 38.7 ± 1.4         | 27.9 ± 6.4          | 32.3 ± 8.9         |
| 55-64     |           | 39.9 ± 1.1         | 28.0 ± 5.5          | 34.4 ± 6.4         |
| 65-74     |           | 36.9 ± 1.0         | 12.6 ± 3.9 ***      | 30.5 ± 5.9         |
| 75+       |           | 26.2 ± 1.0         | 19.4 ± 6.2          | 21.8 ± 6.5         |
| 04-13     |           | 6-Mo RSR           |                     |                    |
|           | all       | 70.5 ± 0.4 (17165) | 61.8 ± 2.3 (489) ** | 70.2 ± 2.2 (457) * |
|           | 20-44     | 76.5 ± 1.8 (575)   | 52.3 ± 11.6 (19)    | 66.8 ± 9.1 (28)    |
|           | 45-54     | 75.6 ± 0.9 (2360)  | 64.1 ± 4.5 (120) *  | 81.3 ± 4.7 (70)    |
|           | 55-64     | 75.3 ± 0.6 (5165)  | 66.7 ± 3.7 (166)    | 73.3 ± 3.9 (138)   |
|           | 65-74     | 73.7 ± 0.7 (4735)  | 63.9 ± 4.7 (110)    | 69.1 ± 4.7 (101)   |
|           | 75+       | 57.6 ± 0.8 (4330)  | 46.7 ± 6.1 (74)     | 61.9 ± 4.6 (120)   |
|           | 18-Mo RSR |                    |                     |                    |
|           | All       | 40.3 ± 0.4         | 37.2 ± 2.4          | 37.4 ± 2.4         |
|           | 20-44     | 42.8 ± 2.2         | 25.5 ± 11.3         | 32.4 ± 9.6         |
|           | 45-54     | 43.1 ± 1.1         | 38.7 ± 4.8          | 42.4 ± 6.2         |

---

|       |            |            |            |
|-------|------------|------------|------------|
| 55-64 | 44.9 ± 0.7 | 44.3 ± 4.2 | 39.0 ± 4.4 |
| 65-74 | 43.6 ± 0.8 | 34.2 ± 5.0 | 42.6 ± 5.2 |
| 75+   | 29.2 ± 0.8 | 24.8 ± 5.6 | 29.2 ± 4.5 |

---

Data are means ± standard error of the mean, with number of patients in parentheses. Abbreviations: Mo, month; RSR, relative survival rate; SEM, standard error of the mean. \* $p < 0.05$ , \*\* $p < 0.001$ , and \*\*\* $p < 0.0001$  for comparisons with the White group.

**Table S6. 12-month relative survival rates of EAC patients according to SES, age and three decades.**

| Decade | Age Group | SES               |                        |
|--------|-----------|-------------------|------------------------|
|        |           | Low Poverty       | Med-High Poverty       |
| 84-93  | 12-Mo RSR |                   |                        |
|        | all       | 39.5±1.3(1514)    | 38.8±1.5(1070)         |
|        | 20-44     | 32.2±6.3(56)      | 43.0±7.1(49)           |
|        | 45-54     | 50.6±3.6(192)     | 46.5±4.6 (119)         |
|        | 55-64     | 45.9±2.5(403)     | 41.4±2.9(296)          |
|        | 65-74     | 34.4±2.2(495)     | 37.3±2.6(375)          |
|        | 75+       | 34.4±2.6(368)     | 33.0±3.2(249)          |
| 94-03  | 12-Mo RSR |                   |                        |
|        | All       | 48.7 ± 0.8 (4141) | 43.4 ± 0.7 (5055) ***  |
|        | 20-44     | 52.5 ± 3.5 (202)  | 52.1 ± 3.5 (207)       |
|        | 45-54     | 55.9 ± 2.0 (620)  | 45.3 ± 1.8 (778) ***   |
|        | 55-64     | 54.2 ± 1.6 (1047) | 48.5 ± 1.4 (1269) *    |
|        | 65-74     | 49.9 ± 1.5 (1184) | 44.5 ± 1.3 (1508) *    |
|        | 75+       | 37.0 ± 1.6 (1088) | 34.3 ± 1.4 (1293)      |
| 04-13  | 12-Mo RSR |                   |                        |
|        | All       | 54.3 ± 0.6 (7379) | 48.4 ± 0.5 (10732) *** |
|        | 20-44     | 58.5 ± 3.2 (245)  | 52.7 ± 2.7 (377)       |
|        | 45-54     | 59.8 ± 1.6 (1030) | 51.4 ± 1.3 (1520) ***  |
|        | 55-64     | 59.7 ± 1.1 (2194) | 53.4 ± 0.9 (3275) ***  |
|        | 65-74     | 57.7 ± 1.2 (2015) | 50.6 ± 1.0 (2931) ***  |
|        | 75+       | 40.7 ± 1.2 (1895) | 37.1 ± 1.0 (2629) *    |

Data are means ± standard error of the mean, with number of patients in parentheses. Abbreviations: Mo, month; RSR, relative survival rate; SEM, standard error of the mean. \* $p < 0.05$ , \*\* $p < 0.001$ , and \*\*\* $p < 0.0001$  for comparisons with the Low-Poverty group

**Table S7. 6-month and 18-month relative survival rates of EAC patients according to SES, age and three decades.**

| Decade | Age Group | SES               |                        |
|--------|-----------|-------------------|------------------------|
|        |           | Low Poverty       | Med-High Poverty       |
| 84-93  | 6-Mo RSR  |                   |                        |
|        | All       | 63.8 ± 1.3 (1514) | 62.4 ± 1.5 (1070)      |
|        | 20-44     | 62.6 ± 6.5 (56)   | 71.5 ± 6.5 (49)        |
|        | 45-54     | 77.2 ± 3.1 (192)  | 79.2 ± 3.7 (119)       |
|        | 55-64     | 70.3 ± 2.3 (403)  | 66.7 ± 2.8 (296)       |
|        | 65-74     | 58.7 ± 2.3 (495)  | 57.8 ± 2.7 (357)       |
|        | 75+       | 56.6 ± 2.7 (368)  | 53.9 ± 3.3 (249)       |
|        | 18-Mo RSR |                   |                        |
|        | All       | 26.2 ± 1.2 (1514) | 27.0 ± 1.4 (1070)      |
|        | 20-44     | 19.7 ± 5.3 (56)   | 34.8 ± 6.8 (49)        |
|        | 45-54     | 33.3 ± 3.4 (192)  | 30.6 ± 4.3 (119)       |
|        | 55-64     | 31.8 ± 2.4 (403)  | 29.9 ± 2.7 (296)       |
|        | 65-74     | 22.5 ± 1.9 (495)  | 25.9 ± 2.4 (357)       |
|        | 75+       | 22.4 ± 2.4 (368)  | 21.8 ± 2.8 (249)       |
| 94-03  | 6-Mo RSR  |                   |                        |
|        | all       | 68.4 ± 0.7 (4141) | 64.1 ± 0.7 (5055) ***  |
|        | 20-44     | 74.3 ± 3.1 (202)  | 73.9 ± 3.1 (207)       |
|        | 45-54     | 75.3 ± 1.7 (620)  | 68.3 ± 1.7 (778) *     |
|        | 55-64     | 74.4 ± 1.4 (1047) | 69.8 ± 1.3 (1269) *    |
|        | 65-74     | 69.1 ± 1.4 (1184) | 64.7 ± 1.3 (1508) *    |
|        | 75+       | 56.7 ± 1.6 (1088) | 53.6 ± 1.4 (1293)      |
|        | 18-Mo RSR |                   |                        |
|        | All       | 37.3 ± 0.8 (4141) | 32.8 ± 0.7 (5055) ***  |
|        | 20-44     | 38.9 ± 3.5 (202)  | 38.5 ± 3.4 (207)       |
|        | 45-54     | 41.9 ± 2.0 (620)  | 35.3 ± 1.7 (778) *     |
|        | 55-64     | 42.7 ± 1.6 (1047) | 36.8 ± 1.4 (1269) *    |
|        | 65-74     | 38.9 ± 1.5 (1184) | 33.8 ± 1.3 (1508) *    |
|        | 75+       | 27.1 ± 1.5 (1088) | 25.1 ± 1.3 (1293)      |
| 04-13  | 6-Mo RSR  |                   |                        |
|        | all       | 73.1 ± 0.5 (7379) | 68.3 ± 0.5 (10732) *** |
|        | 20-44     | 79.6 ± 2.6 (245)  | 72.5 ± 2.4 (377)       |
|        | 45-54     | 79.5 ± 1.3 (1030) | 72.3 ± 1.2 (1520) ***  |
|        | 55-64     | 78.2 ± 0.9 (2194) | 72.9 ± 0.8 (3275) ***  |
|        | 65-74     | 76.7 ± 1.0 (2015) | 71.1 ± 0.9 (2931) ***  |
|        | 75+       | 59.0 ± 1.2 (1895) | 56.4 ± 1.0 (2629)      |
|        | 18-Mo RSR |                   |                        |
|        | All       | 43.6 ± 0.6 (7379) | 37.8 ± 0.5 (10732) *** |

|       |                   |                       |
|-------|-------------------|-----------------------|
| 20-44 | 45.0 ± 3.3 (245)  | 39.7 ± 2.7 (377)      |
| 45-54 | 47.8 ± 1.6 (1030) | 39.6 ± 1.3 (1520) *** |
| 55-64 | 48.3 ± 1.1 (2194) | 42.4 ± 0.9 (3275) *** |
| 65-74 | 48.2 ± 1.2 (2015) | 40.1 ± 1.0 (2931) *** |
| 75+   | 30.7 ± 1.2 (1895) | 28.0 ± 1.0 (2629)     |

Data are means ± standard error of the mean, with number of patients in parentheses. Abbreviations: Mo, month; RSR, relative survival rate; SEM, standard error of the mean. \* $p < 0.05$ , \*\* $p < 0.001$ , and \*\*\* $p < 0.0001$  for comparisons with the Low Poverty group.

**Table S8.** Summary data for race distribution by SES and calendar period in patients with EAC during thirty years.

| Decades   | SES              | Number | White  | Black  | Other |
|-----------|------------------|--------|--------|--------|-------|
| 1984-2013 |                  |        |        |        |       |
|           | Total            | 28,098 | 80.06% | 13.90% | 6.05% |
|           | Low Poverty      | 16,015 | 89.58% | 6.23%  | 4.18% |
|           | Med-High Poverty | 12,083 | 67.43% | 24.06% | 8.52% |
| 1984-1993 |                  |        |        |        |       |
|           | Total            | 7,965  | 73.95% | 20.84% | 5.21% |
|           | Low Poverty      | 4,168  | 89.30% | 9.21%  | 1.49% |
|           | Med-High Poverty | 3,797  | 57.10% | 33.61% | 9.30% |
| 1994-2003 |                  |        |        |        |       |
|           | Total            | 9,373  | 80.36% | 13.53% | 6.11% |
|           | Low Poverty      | 5,364  | 90.29% | 6.15%  | 3.56% |
|           | Med-High Poverty | 4,009  | 67.07% | 23.40% | 9.53% |
| 2004-2013 |                  |        |        |        |       |
|           | Total            | 10,760 | 84.31% | 9.08%  | 6.61% |
|           | Low Poverty      | 6,483  | 89.19% | 4.38%  | 6.43% |
|           | Med-High Poverty | 4,277  | 76.92% | 16.20% | 6.87% |
